# Supplementary material
Source: publisher figshare collection journal article supplement (https://tandf.figshare.com/articles/dataset/_/5303074)

# **Vulvar Cancer in Germany: Increase in Incidence and Change in Tumour Biological Characteristics from 1974-2013**

## **SUPPLEMENTARY FIGURE**

Supplementary Figure 1: Age-standardised incidence of invasive cancer of the cervix (ICD-9: 180, ICD-10: C53) and ovary (ICD-9: 183, ICD-10: C56) (A) and the base of tongue and tonsils (ICD-9: 141.0, 146.0-146.2, ICD-10: C01, C09) and anal cancer (ICD-9: 154.2, 154.3, ICD-10: C21) (B) in Saarland between 1974 and 2013.

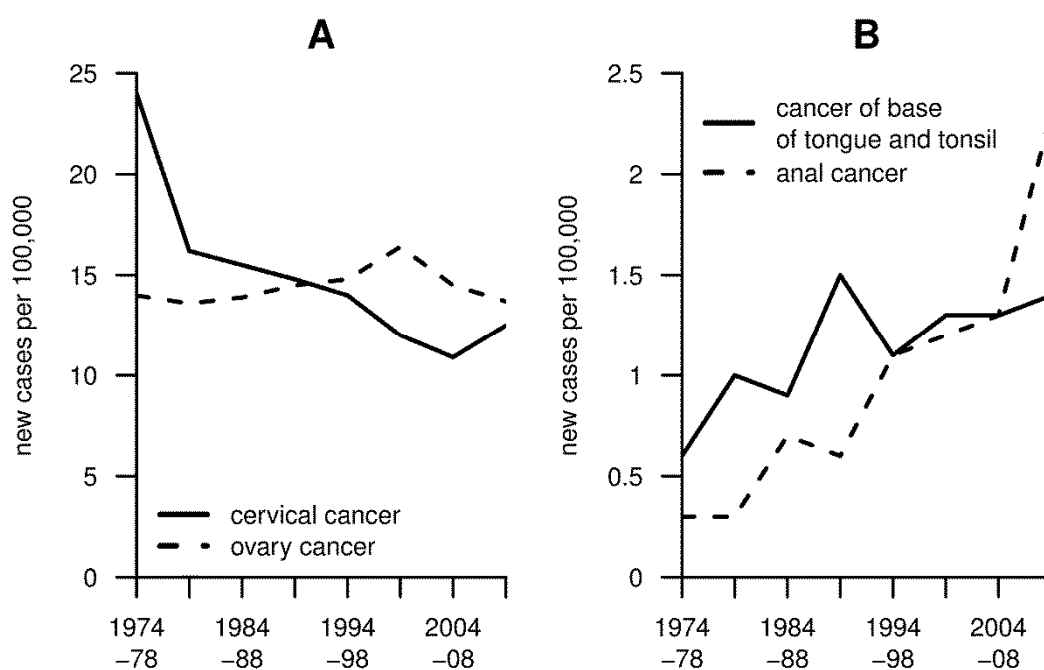

Supplement: Supplementary file 1 [file 1]
