# Supplementary material
Source: publisher figshare collection journal article supplement (https://tandf.figshare.com/articles/dataset/_/5303074)
Supplement: Supplementary file 3 [file 1]

## Vulvar Cancer in Germany: Increase in Incidence and Change in Tumour Biological Characteristics from 1974-2013

Supplementary Table 1: Characteristics of patients with invasive vulvar cancer (ICD-9: 184.1-184.4, ICD-10: C51) from Saarland diagnosed between 1989 and 2013 (analysis based on data with missing values).

|                                              | 1989-1993 |    | 1994-1998 |    | 1999-2003 |    | 2004-2008 |    | 2009-2013 |    |
|----------------------------------------------|-----------|----|-----------|----|-----------|----|-----------|----|-----------|----|
|                                              | N         | %  | N         | %  | N         | %  | N         | %  | N         | %  |
| Overall                                      | 91        |    | 88        |    | 123       |    | 295       |    | 325       |    |
| Median age at diagnosis                      | 72 yrs    |    | 76.5 yrs  |    | 75 yrs    |    | 70 yrs    |    | 69 yrs    |    |
| Lower and upper quartile of age at diagnosis | 65; 83    |    | 67; 85    |    | 64; 83    |    | 58; 79    |    | 55; 79    |    |
| <= 54 years                                  | 10        | 11 | 3         | 9  | 12        | 10 | 63        | 21 | 76        | 23 |
| 55-74 years                                  | 41        | 45 | 8         | 34 | 48        | 39 | 121       | 41 | 134       | 41 |
| >=75 years                                   | 40        | 44 | 30        | 57 | 63        | 51 | 111       | 38 | 115       | 35 |
| Death certificate only notified              | 2         | 2  | 0         | 0  | 5         | 4  | 3         | 1  | 1         | 0  |
| Tumour size available                        | 50        | 55 | 57        | 65 | 87        | 71 | 244       | 83 | 259       | 80 |
| T1 <sup>1</sup>                              | 15        | 30 | 19        | 33 | 32        | 37 | 119       | 49 | 211       | 81 |
| T2 <sup>1</sup>                              | 22        | 44 | 27        | 47 | 47        | 54 | 112       | 46 | 37        | 14 |
| T3/4 <sup>1</sup>                            | 13        | 26 | 11        | 19 | 8         | 9  | 13        | 5  | 11        | 4  |
| Clinical stage <sup>3</sup> available        | 40        | 44 | 30        | 34 | 53        | 43 | 111       | 38 | 139       | 43 |
| Clinical stage I <sup>1,3</sup>              | 8         | 20 | 9         | 30 | 15        | 28 | 35        | 32 | 68        | 49 |
| Clinical stage II <sup>1,3</sup>             | 2         | 5  | 3         | 10 | 14        | 26 | 21        | 19 | 6         | 4  |
| Clinical stage III <sup>1,3</sup>            | 15        | 38 | 9         | 30 | 13        | 25 | 35        | 32 | 38        | 27 |
| Clinical stage IV <sup>1,3</sup>             | 15        | 38 | 9         | 30 | 11        | 21 | 20        | 18 | 27        | 19 |
| Microscopically verified                     | 89        | 98 | 85        | 97 | 117       | 95 | 289       | 98 | 322       | 99 |
| Squamous cell carcinoma <sup>1,2</sup>       | 73        | 82 | 67        | 79 | 87        | 74 | 258       | 89 | 286       | 89 |

|                                         |    |    |    |    |    |    |     |    |     |    |
|-----------------------------------------|----|----|----|----|----|----|-----|----|-----|----|
| Adenocarcinoma <sup>1,2</sup>           | 1  | 1  | 2  | 2  | 1  | 1  | 2   | 1  | 2   | 1  |
| Malignant melanoma <sup>1,2</sup>       | 2  | 2  | 3  | 4  | 5  | 4  | 4   | 1  | 7   | 2  |
| Basal cell carcinoma <sup>1,2</sup>     | 6  | 7  | 1  | 1  | 13 | 11 | 16  | 6  | 13  | 4  |
| Paget disease <sup>1,2</sup>            | 2  | 2  | 4  | 5  | 4  | 3  | 7   | 2  | 7   | 2  |
| Other/unspecified tumors <sup>1,2</sup> | 5  | 6  | 6  | 7  | 7  | 6  | 2   | 1  | 7   | 2  |
| Histopathologic grade available         | 65 | 71 | 66 | 75 | 89 | 72 | 257 | 87 | 280 | 86 |
| G1 <sup>1</sup>                         | 10 | 15 | 19 | 29 | 9  | 10 | 16  | 6  | 16  | 6  |
| G2 <sup>1</sup>                         | 40 | 62 | 35 | 53 | 53 | 60 | 168 | 65 | 186 | 66 |
| G3/4 <sup>1</sup>                       | 15 | 23 | 12 | 18 | 27 | 30 | 73  | 28 | 78  | 28 |

<sup>1</sup>Numbers of cases and percentages based on observations with available information. <sup>2</sup>Squamous cell carcinoma (ICD-O-3 codes [first 3/4 digits]: 805-808), basal cell carcinoma (809-811), adenocarcinoma (814-838), Paget disease (8542), malignant melanoma (872-879), and other/unspecified (remaining codes). <sup>3</sup>Clinical stage according to the International Federation of Gynecology and Obstetrics (FIGO) based on the sixth edition of the TNM [22].

Supplementary Table 2: Characteristics of patients with invasive vulvar cancer (ICD-9: 184.1-184.4, ICD-10: C51) from Saarland diagnosed between 1989 and 2013 (analysis based on 15 multiply imputed datasets).

|                                              | 1989-1993 |    | 1994-1998 |    | 1999-2003 |    | 2004-2008 |    | 2009-2013 |    | <i>P</i> value <sup>1</sup> |
|----------------------------------------------|-----------|----|-----------|----|-----------|----|-----------|----|-----------|----|-----------------------------|
|                                              | N         | %  | N         | %  | N         | %  | N         | %  | N         | %  |                             |
| Overall                                      | 91        |    | 88        |    | 123       |    | 295       |    | 325       |    |                             |
| Median age at diagnosis                      | 72 yrs    |    | 76.5 yrs  |    | 75 yrs    |    | 70 yrs    |    | 69 yrs    |    | 0.007                       |
| Lower and upper quartile of age at diagnosis | 65; 83    |    | 67; 85    |    | 64; 83    |    | 58; 79    |    | 55; 79    |    |                             |
| <= 54 years                                  | 10        | 11 | 3         | 9  | 12        | 10 | 63        | 21 | 76        | 23 | < 0.001                     |
| 55-74 years                                  | 41        | 45 | 8         | 34 | 48        | 39 | 121       | 41 | 134       | 41 |                             |
| >= 75 years                                  | 40        | 44 | 30        | 57 | 63        | 51 | 111       | 38 | 115       | 35 |                             |
| T1 <sup>2</sup>                              | 31        | 34 | 33        | 38 | 52        | 42 | 146       | 49 | 257       | 79 | < 0.001                     |
| T2 <sup>2</sup>                              | 40        | 44 | 38        | 43 | 55        | 44 | 127       | 43 | 46        | 14 |                             |
| T3/4 <sup>2</sup>                            | 20        | 22 | 17        | 20 | 17        | 14 | 22        | 8  | 22        | 7  |                             |
| Clinical stage I <sup>2,4</sup>              | 28        | 31 | 28        | 32 | 49        | 40 | 113       | 38 | 170       | 52 | 0.001                       |
| Clinical stage II <sup>2,4</sup>             | 7         | 8  | 16        | 18 | 24        | 20 | 52        | 18 | 17        | 5  |                             |
| Clinical stage III <sup>2,4</sup>            | 36        | 39 | 33        | 38 | 37        | 30 | 105       | 36 | 105       | 32 |                             |
| Clinical stage IV <sup>2,4</sup>             | 20        | 21 | 11        | 12 | 13        | 11 | 25        | 8  | 33        | 10 |                             |
| Squamous cell carcinoma <sup>2,3</sup>       | 74        | 81 | 69        | 78 | 90        | 73 | 261       | 88 | 287       | 88 | 0.002                       |
| Other invasive cancers <sup>2,3</sup>        | 17        | 19 | 19        | 22 | 33        | 27 | 34        | 12 | 38        | 12 |                             |
| - Basal cell carcinoma <sup>2,3</sup>        | 6         | 7  | 1         | 1  | 13        | 11 | 17        | 6  | 13        | 4  |                             |
| - Adenocarcinoma <sup>2,3</sup>              | 1         | 1  | 3         | 3  | 1         | 1  | 2         | 1  | 2         | 1  |                             |
| - Paget disease <sup>2,3</sup>               | 2         | 2  | 4         | 5  | 4         | 3  | 7         | 2  | 7         | 2  |                             |
| - Malignant melanoma <sup>2,3</sup>          | 2         | 2  | 3         | 3  | 5         | 4  | 4         | 1  | 7         | 2  |                             |
| - Other/unspecified tumors <sup>2,3</sup>    | 6         | 7  | 9         | 10 | 10        | 8  | 4         | 1  | 9         | 3  |                             |
| G1 <sup>2</sup>                              | 15        | 16 | 27        | 31 | 10        | 8  | 24        | 8  | 24        | 7  | < 0.001                     |
| G2 <sup>2</sup>                              | 56        | 61 | 39        | 44 | 63        | 51 | 183       | 62 | 215       | 66 |                             |
| G3/4 <sup>2</sup>                            | 20        | 22 | 22        | 25 | 49        | 40 | 88        | 30 | 87        | 27 |                             |

<sup>1</sup>Mood's test (H0: no trend in median age at diagnosis over time) and chi-squared test (H0: no differences in the distribution of patient or tumour characteristics across different calendar periods; for testing whether the proportion of squamous cell carcinoma changed over time, all other invasive cancers were combined). <sup>2</sup>Rounded numbers of cases and percentages based on 15 multiply imputed datasets. <sup>3</sup>Squamous cell carcinoma (ICD-O-3 codes [first 3/4 digits]: 805-808), basal cell carcinoma (809-811), adenocarcinoma (814-838), Paget disease (8542), malignant melanoma (872-879), and other/unspecified (remaining codes). <sup>4</sup> Clinical stage according to the International Federation of Gynecology and Obstetrics (FIGO) based on the sixth edition of the TNM [22].

Supplementary Table 3: Truncated age-standardised incidence rates of invasive vulvar cancer (ICD-9: 184.1-184.4, ICD-10: C51) according to tumour size, clinical stage, tumour morphology and histopathologic grade in Saarland between 1989 and 2013 and distribution of tumour characteristics of patients diagnosed in 2009-13 across age groups

|                                      | Age <= 54 years |           |           |           |           |    |    | Age 55-74 years |           |           |           |           |     |    | Age >= 75 years |           |           |           |           |    |    | P value <sup>1</sup> |
|--------------------------------------|-----------------|-----------|-----------|-----------|-----------|----|----|-----------------|-----------|-----------|-----------|-----------|-----|----|-----------------|-----------|-----------|-----------|-----------|----|----|----------------------|
|                                      | 1989-1993       | 1994-1998 | 1999-2003 | 2004-2008 | 2009-2013 |    |    | 1989-1993       | 1994-1998 | 1999-2003 | 2004-2008 | 2009-2013 |     |    | 1989-1993       | 1994-1998 | 1999-2003 | 2004-2008 | 2009-2013 |    |    |                      |
|                                      | N               | N         | N         | N         | N         |    |    | N               | N         | N         | N         | N         |     |    | N               | N         | N         | N         | N         |    |    |                      |
| Overall                              | 10              | 8         | 12        | 63        | 76        |    |    | 41              | 30        | 48        | 121       | 134       |     |    | 40              | 50        | 63        | 111       | 115       |    |    |                      |
|                                      |                 |           |           |           |           |    |    |                 |           |           |           |           |     |    |                 |           |           |           |           |    |    |                      |
|                                      | TASR            | TASR      | TASR      | TASR      | TASR      | N  | %  | TASR            | TASR      | TASR      | TASR      | TASR      | N   | %  | TASR            | TASR      | TASR      | TASR      | TASR      | N  | %  |                      |
| Overall                              | 0.5             | 0.4       | 0.6       | 2.8       | 3.8       |    |    | 5.9             | 4.0       | 6.9       | 17.0      | 19.7      |     |    | 16.0            | 19.0      | 21.3      | 35.6      | 34.0      |    |    |                      |
| Crude rate <sup>2</sup>              | 0.5             | 0.4       | 0.7       | 3.7       | 4.8       |    |    | 6.3             | 4.3       | 7.3       | 18.5      | 20.1      |     |    | 15.7            | 19.6      | 21.6      | 35.7      | 34.5      |    |    |                      |
| T1 <sup>3</sup>                      | 0.5             | 0.1       | 0.3       | 2.0       | 3.6       | 70 | 92 | 1.8             | 1.4       | 3.3       | 9.6       | 16.3      | 109 | 82 | 3.3             | 8.0       | 7.3       | 11.1      | 23.0      | 78 | 68 | 0.008                |
| T2 <sup>3</sup>                      | 0.0             | 0.2       | 0.2       | 0.6       | 0.2       | 4  | 6  | 2.9             | 1.8       | 2.9       | 6.5       | 2.7       | 19  | 14 | 8.4             | 7.8       | 10.2      | 21.0      | 7.0       | 23 | 20 |                      |
| T3/4 <sup>3</sup>                    | 0.0             | 0.1       | 0.0       | 0.2       | 0.0       | 1  | 2  | 1.2             | 0.8       | 0.6       | 0.9       | 0.7       | 6   | 4  | 4.3             | 3.2       | 3.8       | 3.4       | 4.1       | 14 | 12 |                      |
| Clinical stage I <sup>3</sup>        | 0.4             | 0.1       | 0.3       | 1.4       | 2.6       | 50 | 66 | 1.8             | 1.3       | 3.2       | 7.5       | 10.6      | 70  | 52 | 3.2             | 6.6       | 7.0       | 8.8       | 14.9      | 50 | 44 |                      |
| Clinical stage II <sup>3</sup>       | 0.0             | 0.2       | 0.0       | 0.1       | 0.0       | 1  | 1  | 0.7             | 1.0       | 1.6       | 2.9       | 0.9       | 7   | 5  | 1.3             | 1.8       | 4.4       | 9.5       | 2.8       | 9  | 8  | 0.141                |
| Clinical stage III <sup>3</sup>      | 0.1             | 0.1       | 0.1       | 1.0       | 1.1       | 23 | 31 | 2.5             | 1.3       | 1.8       | 5.1       | 5.8       | 40  | 30 | 6.9             | 8.1       | 6.7       | 14.4      | 12.4      | 42 | 37 |                      |
| Clinical stage IV <sup>3</sup>       | 0.0             | 0.1       | 0.1       | 0.2       | 0.1       | 2  | 3  | 1.0             | 0.4       | 0.3       | 1.6       | 2.3       | 17  | 13 | 4.6             | 2.6       | 3.2       | 2.9       | 4.0       | 13 | 12 |                      |
| Squamous cell carcinoma <sup>3</sup> | 0.3             | 0.2       | 0.4       | 2.4       | 3.4       | 67 | 88 | 5.1             | 3.3       | 4.9       | 15.8      | 18.2      | 124 | 92 | 13.2            | 15.5      | 16.0      | 30.3      | 29.0      | 97 | 84 | 0.375                |
| Other invasive cancers <sup>3</sup>  | 0.2             | 0.2       | 0.1       | 0.3       | 0.5       | 9  | 12 | 0.7             | 0.7       | 1.9       | 1.1       | 1.4       | 10  | 8  | 2.8             | 3.6       | 5.3       | 5.2       | 5.0       | 18 | 16 |                      |
| - Basal cell carcinoma <sup>3</sup>  | 0.0             | 0.0       | 0.0       | 0.2       | 0.1       | 2  | 3  | 0.4             | 0.0       | 1.0       | 0.2       | 0.6       | 4   | 3  | 1.1             | 0.4       | 2.0       | 3.1       | 1.9       | 7  | 6  |                      |
| - Adenocarcinoma <sup>3</sup>        | 0.0             | 0.0       | 0.0       | 0.0       | 0.0       | 0  | 0  | 0.1             | 0.0       | 0.0       | 0.2       | 0.0       | 0   | 0  | 0.0             | 0.9       | 0.3       | 0.0       | 0.5       | 2  | 2  |                      |
| - Paget disease <sup>3</sup>         | 0.1             | 0.0       | 0.0       | 0.0       | 0.1       | 2  | 3  | 0.0             | 0.2       | 0.1       | 0.4       | 0.5       | 3   | 2  | 0.0             | 0.7       | 1.0       | 1.2       | 0.6       | 2  | 2  | 1.000                |
| - Malignant melanoma <sup>3</sup>    | 0.0             | 0.0       | 0.1       | 0.1       | 0.2       | 3  | 4  | 0.1             | 0.2       | 0.1       | 0.1       | 0.0       | 9   | 0  | 0.5             | 0.3       | 0.4       | 0.3       | 1.0       | 4  | 4  |                      |
| - Other/unspecified <sup>3</sup>     | 0.1             | 0.2       | 0.0       | 0.0       | 0.1       | 2  | 3  | 0.1             | 0.3       | 0.7       | 0.2       | 0.3       | 3   | 2  | 1.3             | 1.3       | 1.6       | 0.6       | 1.0       | 3  | 3  |                      |
| G1 <sup>3</sup>                      | 0.0             | 0.1       | 0.1       | 0.3       | 0.2       | 4  | 5  | 1.4             | 1.2       | 0.4       | 0.9       | 1.2       | 8   | 6  | 2.4             | 6.7       | 1.9       | 3.2       | 3.4       | 12 | 10 |                      |
| G2 <sup>3</sup>                      | 0.4             | 0.2       | 0.2       | 1.7       | 2.7       | 52 | 68 | 2.9             | 2.2       | 3.3       | 10.7      | 14.0      | 93  | 69 | 10.5            | 7.4       | 12.2      | 21.5      | 20.7      | 70 | 61 |                      |
| G3/4 <sup>3</sup>                    | 0.1             | 0.1       | 0.3       | 0.8       | 1.0       | 21 | 27 | 1.7             | 0.7       | 3.2       | 5.3       | 4.5       | 33  | 25 | 3.2             | 5.0       | 7.2       | 10.9      | 9.9       | 33 | 29 |                      |

TASR: truncated age-standardised rate. <sup>1</sup>Chi-squared test for homogeneity (H0: no differences in the distribution of tumour characteristics between patients aged  $\leq 54$ , 55-74, and  $\geq 75$  years in 2009-13; for testing whether the proportion of squamous cell carcinoma changed across age groups, all other invasive cancers were combined. <sup>2</sup>No adjustment for age. <sup>3</sup>TASRs, rounded numbers of cases, and percentages based on 15 multiply imputed datasets. <sup>4</sup>Clinical stage according to the International Federation of Gynecology and Obstetrics (FIGO) based on the sixth edition of the TNM [22].
